# Supplementary material for: Highly spin-polarized electronic structure and magnetic properties of Mn2.25Co0.75Al1−xGex Heusler alloys: first-principles calculations
Source: Royal Society of Chemistry journal article supplement (doi:10.1039/d0ra03413d), 2020-01-01
Supplement: d0ra03413d1.pdf [file d0ra03413d1.pdf]

## Supplementary Information

### Highly spin-polarized electronic structure and magnetic properties of Mn<sub>2.25</sub>Co<sub>0.75</sub>Al<sub>1-x</sub>Gex Heusler alloys: first-principles calculations

Yue Wang<sup>a</sup>, Liying Wang<sup>a,b\*</sup> and Wenbo Mi<sup>a</sup>

<sup>a</sup>*Tianjin Key Laboratory of Low Dimensional Materials Physics and Preparation Technology,  
School of Science, Tianjin University, Tianjin 300354, China*

<sup>b</sup>*Tianjin Demonstration Center for Experimental Physics Education, School of Science, Tianjin  
University, Tianjin 300354, China*

---

\* Author to whom all correspondence should be addressed.

E-mail address: [liying.wang@tju.edu.cn](mailto:liying.wang@tju.edu.cn) (Liying Wang)

### A. Band structures of $\text{Mn}_2\text{CoAl}$ and $\text{Mn}_{2.25}\text{Co}_{0.75}\text{Al}_{1-x}\text{Ge}_x$ at the ground states with SOC

The calculated band structures of  $\text{Mn}_2\text{CoAl}$  and  $\text{Mn}_{2.25}\text{Co}_{0.75}\text{Al}_{1-x}\text{Ge}_x$  by considering SOC are shown in Fig. S1. It is found that SOC does not affect the HM/SGS characteristics of  $\text{Mn}_2\text{CoAl}$  and  $\text{Mn}_{2.25}\text{Co}_{0.75}\text{Al}_{1-x}\text{Ge}_x$ . Only some degenerated states are split into several singlet states at the high symmetry points.

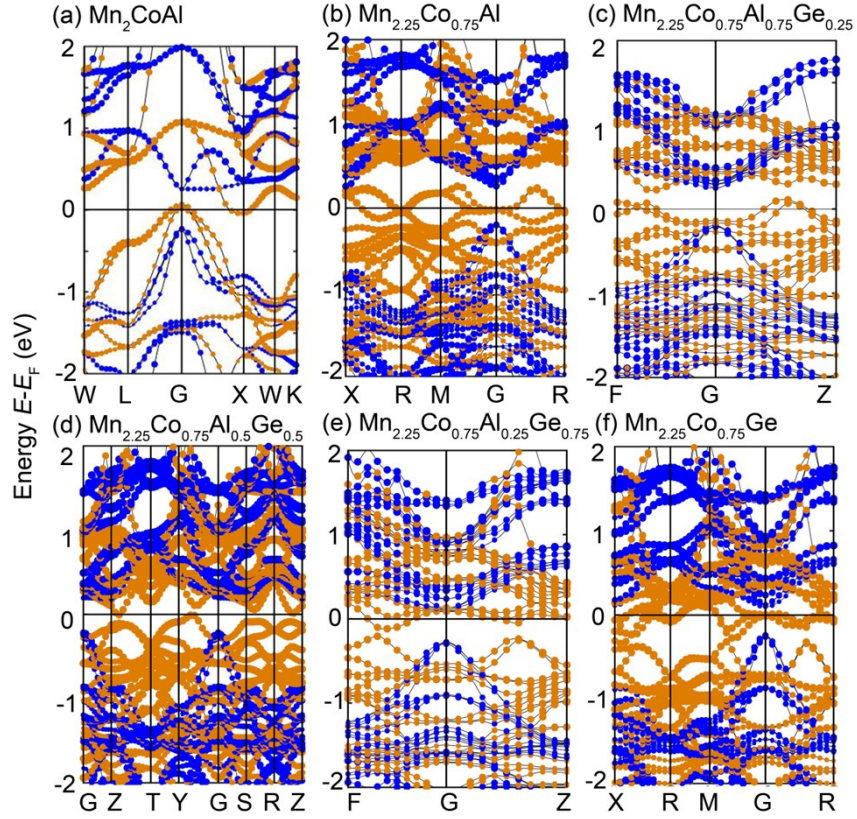

**Fig. S1.** Band structure of (a)  $\text{Mn}_2\text{CoAl}$ , (b)  $\text{Mn}_{2.25}\text{Co}_{0.75}\text{Al}$ , (c)  $\text{Mn}_{2.25}\text{Co}_{0.75}\text{Al}_{0.75}\text{Ge}_{0.25}$ , (d)  $\text{Mn}_{2.25}\text{Co}_{0.75}\text{Al}_{0.5}\text{Ge}_{0.5}$ , (e)  $\text{Mn}_{2.25}\text{Co}_{0.75}\text{Al}_{0.25}\text{Ge}_{0.75}$  and (f)  $\text{Mn}_{2.25}\text{Co}_{0.75}\text{Ge}$  at equilibrium lattice constant with SOC. The origin and blue circles represent the spin-up and spin-down channels, respectively.

## B. Atomic-resolved MAE of $\text{Mn}_2\text{CoAl}$ and $\text{Mn}_{2.25}\text{Co}_{0.75}\text{Al}_{1-x}\text{Ge}_x$ under uniaxial strains

The atomic-resolved MAEs of  $\text{Mn}_2\text{CoAl}$  and  $\text{Mn}_{2.25}\text{Co}_{0.75}\text{Al}_{1-x}\text{Ge}_x$  at a uniaxial strain of -6%, 0% and 6% are shown in Fig.S2. In Fig.S2 (b)-(e), it can be clearly seen that the atomic-resolved MAEs of  $\text{Mn}_{2.25}\text{Co}_{0.75}\text{Al}$ ,  $\text{Mn}_{2.25}\text{Co}_{0.75}\text{Al}_{0.75}\text{Ge}_{0.25}$ ,  $\text{Mn}_{2.25}\text{Co}_{0.75}\text{Al}_{0.5}\text{Ge}_{0.5}$  and  $\text{Mn}_{2.25}\text{Co}_{0.75}\text{Ge}$  at a uniaxial strain of -6%, 0% and 6% display quite similar results with that of  $\text{Mn}_{2.25}\text{Co}_{0.75}\text{Al}_{0.25}\text{Ge}_{0.75}$  which has been discussed detailly in the main work. The nearly zero MAE of the cubic  $\text{Mn}_{2.25}\text{Co}_{0.75}\text{Al}$ ,  $\text{Mn}_{2.25}\text{Co}_{0.75}\text{Al}_{0.75}\text{Ge}_{0.25}$ ,  $\text{Mn}_{2.25}\text{Co}_{0.75}\text{Al}_{0.5}\text{Ge}_{0.5}$  and  $\text{Mn}_{2.25}\text{Co}_{0.75}\text{Ge}$  ( $\varepsilon_t=0\%$ ) mainly comes from the minor opposite MAE of Mn(A2) atom in I -layer and Mn(A3) atom in III-layer. At  $\varepsilon_t=-6\%$ , the positive MAE mainly comes from Mn(A2) and Co(C2) atom in I -layer, Mn(C) and Co(C3) atoms in III-layer. Mn(A3) atom in III-layer contributes a relatively small negative MAE. Thus,  $\text{Mn}_{2.25}\text{Co}_{0.75}\text{Al}_{1-x}\text{Ge}_x$  exhibits the in-plane magnetic anisotropy at  $\varepsilon_t=-6\%$ . At  $\varepsilon_t=6\%$ , every layer contributes a negative net MAE, where Co(C1), Mn(A3) and Mn(C) in I -, III-layers gives much contribution. Thus, the magnetic easy axis turns from the (100) direction into the (001) direction for  $\text{Mn}_{2.25}\text{Co}_{0.75}\text{Al}$ ,  $\text{Mn}_{2.25}\text{Co}_{0.75}\text{Al}_{0.75}\text{Ge}_{0.25}$ ,  $\text{Mn}_{2.25}\text{Co}_{0.75}\text{Al}_{0.5}\text{Ge}_{0.5}$  and  $\text{Mn}_{2.25}\text{Co}_{0.75}\text{Ge}$  with varying uniaxial strains. However, it should be noted that the origin of the MAE in  $\text{Mn}_2\text{CoAl}$  is different from that in  $\text{Mn}_{2.25}\text{Co}_{0.75}\text{Al}_{1-x}\text{Ge}_x$  under uniaxial strain, as shown in Fig.S2 (a). The contribution of Mn(A) and Mn(B) atoms to MAE are negligible which is different from  $\text{Mn}_{2.25}\text{Co}_{0.75}\text{Al}_{1-x}\text{Ge}_x$ . And the negative and positive MAE at  $\varepsilon_t=6\%$  and  $\varepsilon_t=-6\%$  just origin from Co(C) atom.

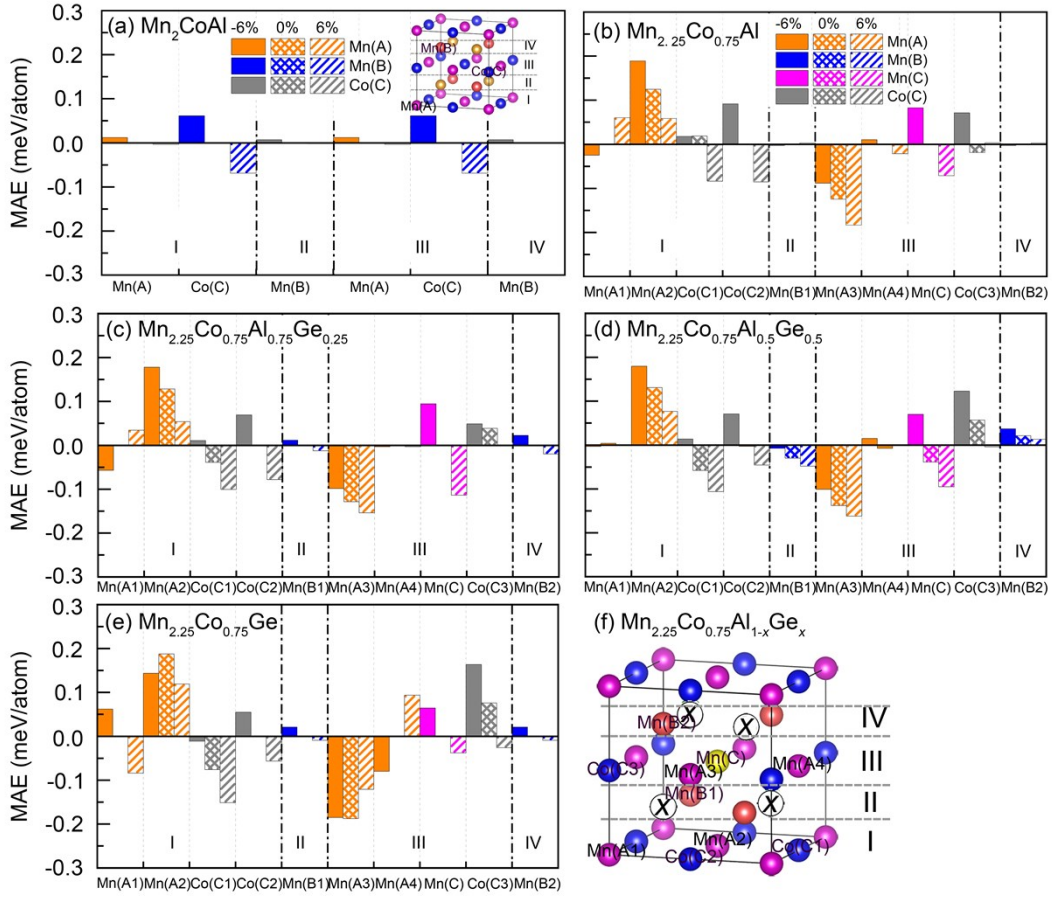

**Fig. S2** Atomic-resolved MAE of (a)  $\text{Mn}_2\text{CoAl}$ , (b)  $\text{Mn}_{2.25}\text{Co}_{0.75}\text{Al}$ , (c)  $\text{Mn}_{2.25}\text{Co}_{0.75}\text{Al}_{0.75}\text{Ge}_{0.25}$ , (d)  $\text{Mn}_{2.25}\text{Co}_{0.75}\text{Al}_{0.5}\text{Ge}_{0.5}$  and (e)  $\text{Mn}_{2.25}\text{Co}_{0.75}\text{Ge}$  at a uniaxial strain of -6%, 0% and 6%. (f) The atomic structure of  $\text{Mn}_{2.25}\text{Co}_{0.75}\text{Al}_{1-x}\text{Ge}_x$  ( $x=0, 0.25, 0.50, 1.00$ ), where I-IV refers to the layer numbers. The inset of (a) is the atomic structure of  $\text{Mn}_2\text{CoAl}$ .
